# Supplementary material for: Brimstone chemistry under laser light assists mass spectrometric detection and imaging the distribution of arsenic in minerals
Source: Royal Society of Chemistry journal article supplement (doi:10.1039/c8dt01042k), 2018-01-01
Supplement: c8dt01042k1.pdf [file c8dt01042k1.pdf]

Supplementary Information for:

## Brimstone Chemistry Under Laser Light Assists Mass Spectrometric Detection and Imaging the Distribution of Arsenic in Minerals

Swapnil Lal,<sup>a</sup> Zhaoyu Zhen,<sup>b</sup> Julius Pavlov,<sup>b</sup> and Athula B. Attygalle<sup>\*b</sup>

<sup>a</sup> Montgomery High School, 1016 Co Rd 601, Skillman NJ 08558 (USA)

<sup>b</sup> Department of Chemistry and Chemical Biology, Stevens Institute of Technology, Hoboken NJ 07030 (USA)

### Table of Contents

| Figure or Table number | Caption                                                                                                                                                                                                                                                                                                                        | Page |
|------------------------|--------------------------------------------------------------------------------------------------------------------------------------------------------------------------------------------------------------------------------------------------------------------------------------------------------------------------------|------|
| Figure S1              | Product-ion (MS <sup>2</sup> ) spectra of $m/z$ 375 for $\text{As}_5^-$ recorded at a transfer collision energy of 10 eV (A), and 15 eV (B). Precursor ions were generated from elemental arsenic.                                                                                                                             | 2    |
| Figure S2              | Plot of percentage relative intensity of $m/z$ 267 (◆), $m/z$ 171 (■), $m/z$ 139 (▲), $m/z$ 107 (✕), and $m/z$ 64 (✕) ions recorded at Transfer-collision energy settings of 2 eV, 5 eV, 10 eV, 15 eV, 20 eV and 30 eV. Transfer collision gas was argon, and Transfer collision cell pressure was $8.72 \times 10^{-3}$ mbar. | 3    |
| Figure S3              | Product-ion (MS <sup>2</sup> ) spectra of $m/z$ 139 for $\text{As}^{32}\text{S}_3^-$ recorded at a transfer-collision energy setting of 10 eV (A), and 20 eV (B). The precursor ion was generated from a mixture of elemental arsenic and S.                                                                                   | 4    |
| Figure S4              | A comparison of the MS <sup>2</sup> spectrum of $m/z$ 235 ion for $\text{As}^{32}\text{S}_5^-$ (A), with that of the $m/z$ 237 for $\text{As}^{32}\text{S}_4^{34}\text{S}^-$ (B) recorded at a transfer CE 10 eV. The precursor ion was generated from a mixture of arsenic and S.                                             | 5    |
| Figure S5              | Intensity ratio of $m/z$ 171 ( $\text{AsS}_3^-$ ) and $m/z$ 96 ( $\text{S}_3^-$ ) peaks versus amount of arsenic (ng) deposited on the sample plate.                                                                                                                                                                           | 6    |
| Table S1               | Correlation between deposited amount of arsenic and $I_{m/z\ 171}/I_{m/z\ 96}$ peak intensity ratios.                                                                                                                                                                                                                          | 6    |
| Figure S6              | Photographic image of the domeykite mineral sample (the rectangular area used for imaging is demarcated with white lines).                                                                                                                                                                                                     | 7    |
| Figure S7              | Photographic image of the latent-print-bearing paper attached to a MALDI plate.                                                                                                                                                                                                                                                | 7    |

## Table and Figures

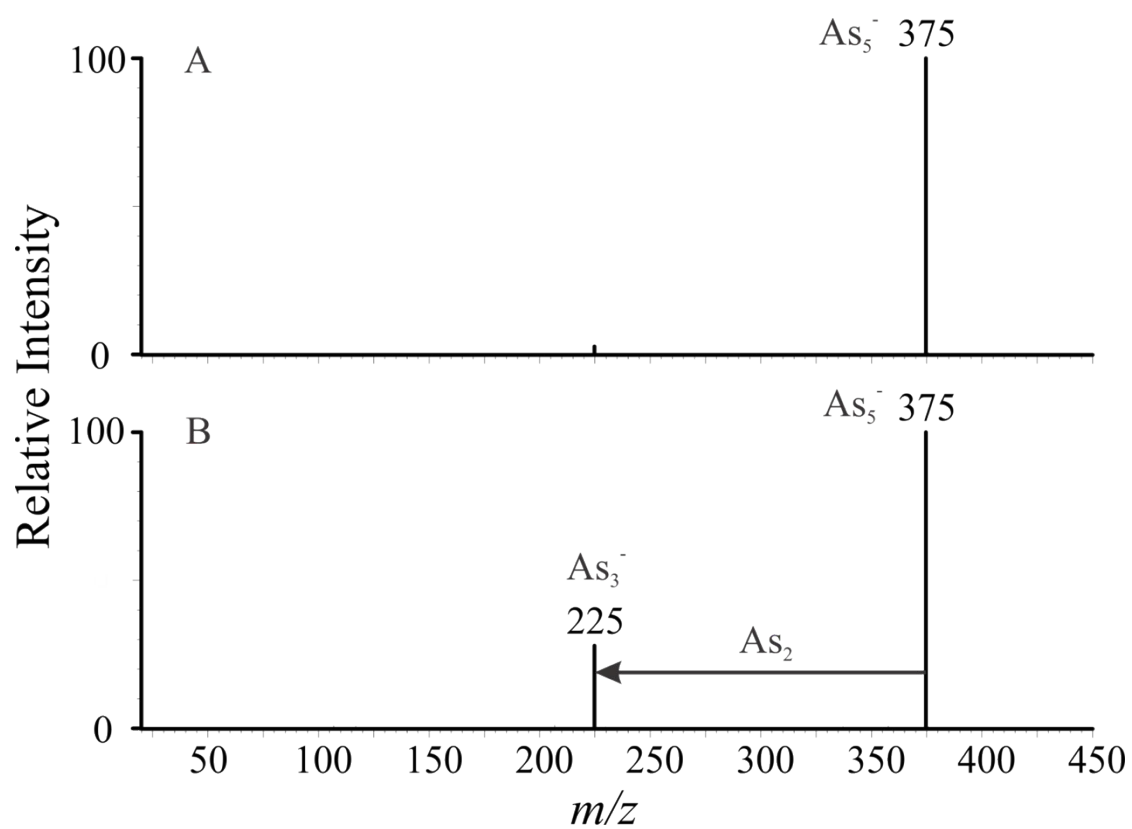

Fig. S1. Product-ion ( $\text{MS}^2$ ) spectra of  $m/z$  375 for  $\text{As}_5^-$  recorded at a transfer collision energy of 10 eV (A), and 15 eV (B). Precursor ions were generated from elemental arsenic.

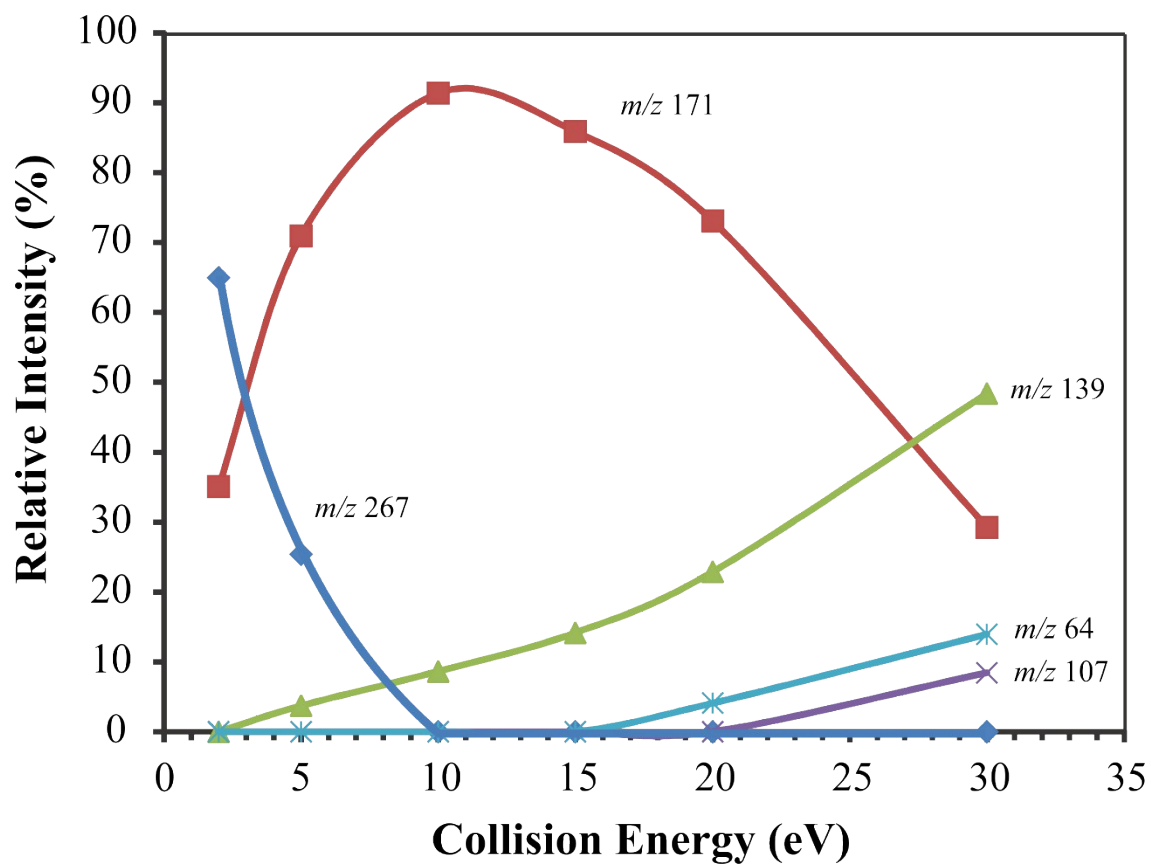

Fig. S2. Plot of percentage relative intensity of  $m/z$  267 ( $\blacklozenge$ ),  $m/z$  171 ( $\blacksquare$ ),  $m/z$  139 ( $\blacktriangle$ ),  $m/z$  107 ( $\times$ ), and  $m/z$  64 ( $\ast$ ) ions recorded at Transfer-collision energy settings of 2 eV, 5 eV, 10 eV, 15 eV, 20 eV and 30 eV. Transfer collision gas was argon, and Transfer collision cell pressure was  $8.72 \times 10^{-3}$  mbar.

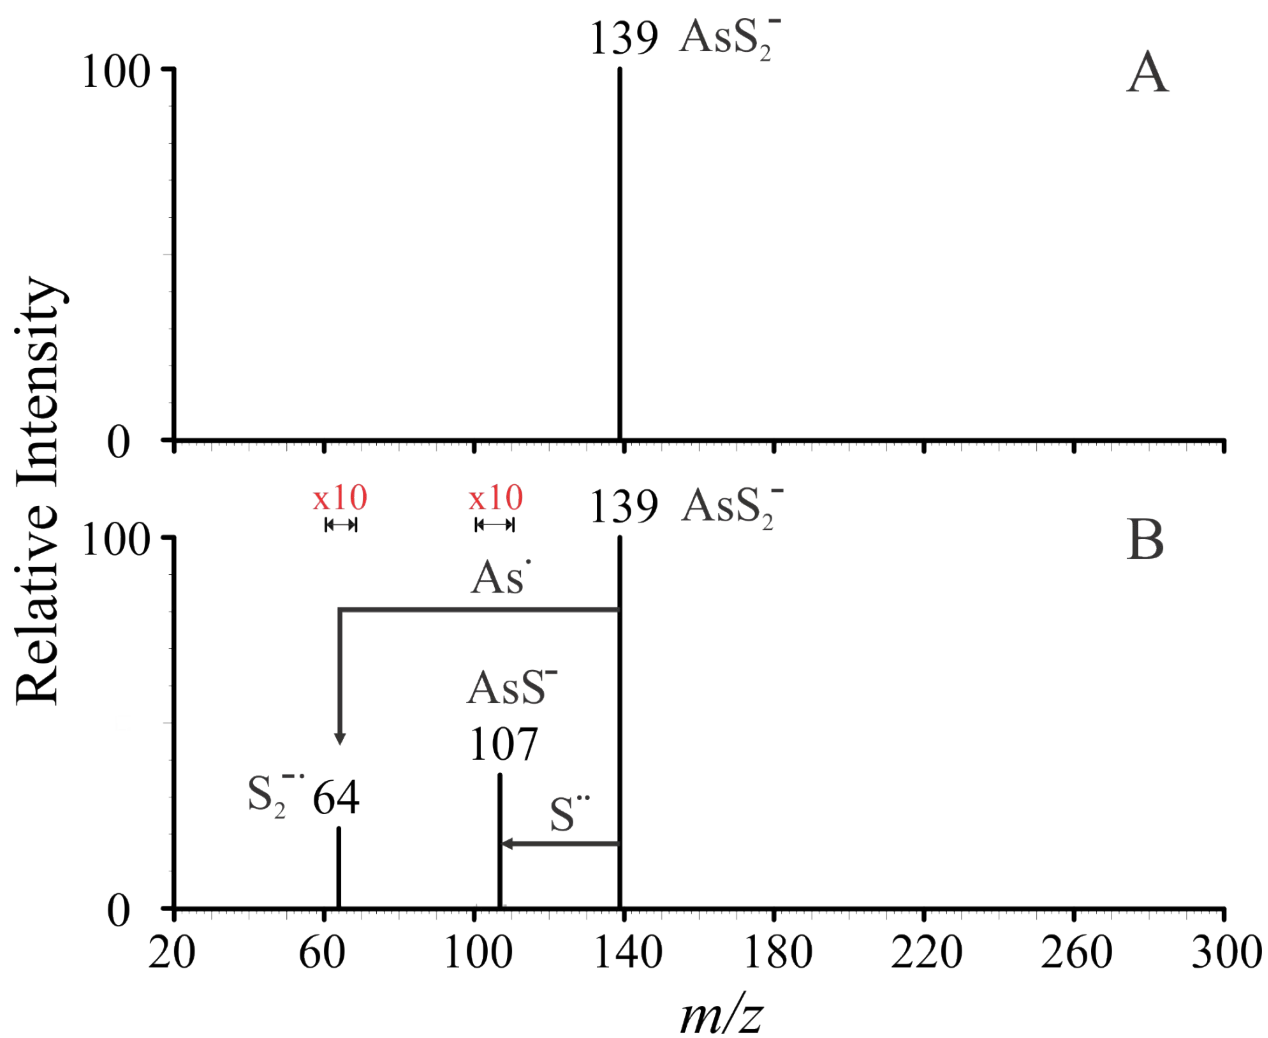

Fig. S3. Product-ion ( $\text{MS}^2$ ) spectra of  $m/z$  139 for  $\text{As}^{32}\text{S}_3^-$  recorded at a transfer-collision energy setting of 10 eV (A), and 20 eV (B). The precursor ion was generated from a mixture of elemental arsenic and S.

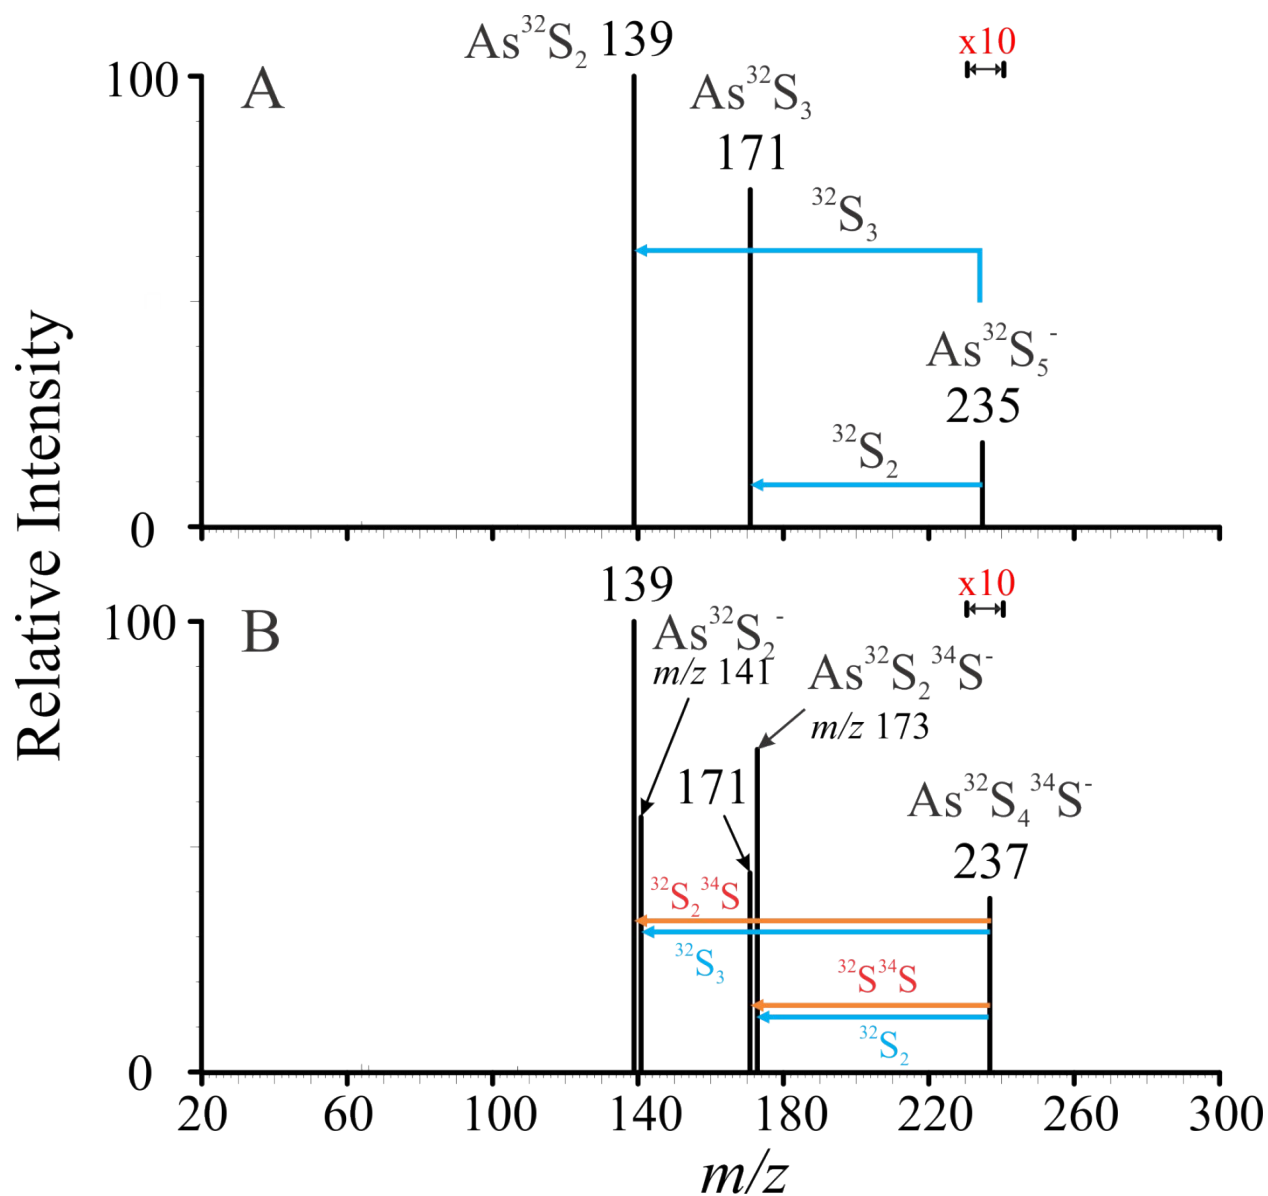

Fig. S4. A comparison of the MS<sup>2</sup> spectrum of  $m/z$  235 ion for  $\text{As}^{32}\text{S}_5^-$  (A), with that of the  $m/z$  237 for  $\text{As}^{32}\text{S}_4^{34}\text{S}^-$  (B) recorded at a transfer CE 10 eV. The precursor ion was generated from a mixture of arsenic and S.

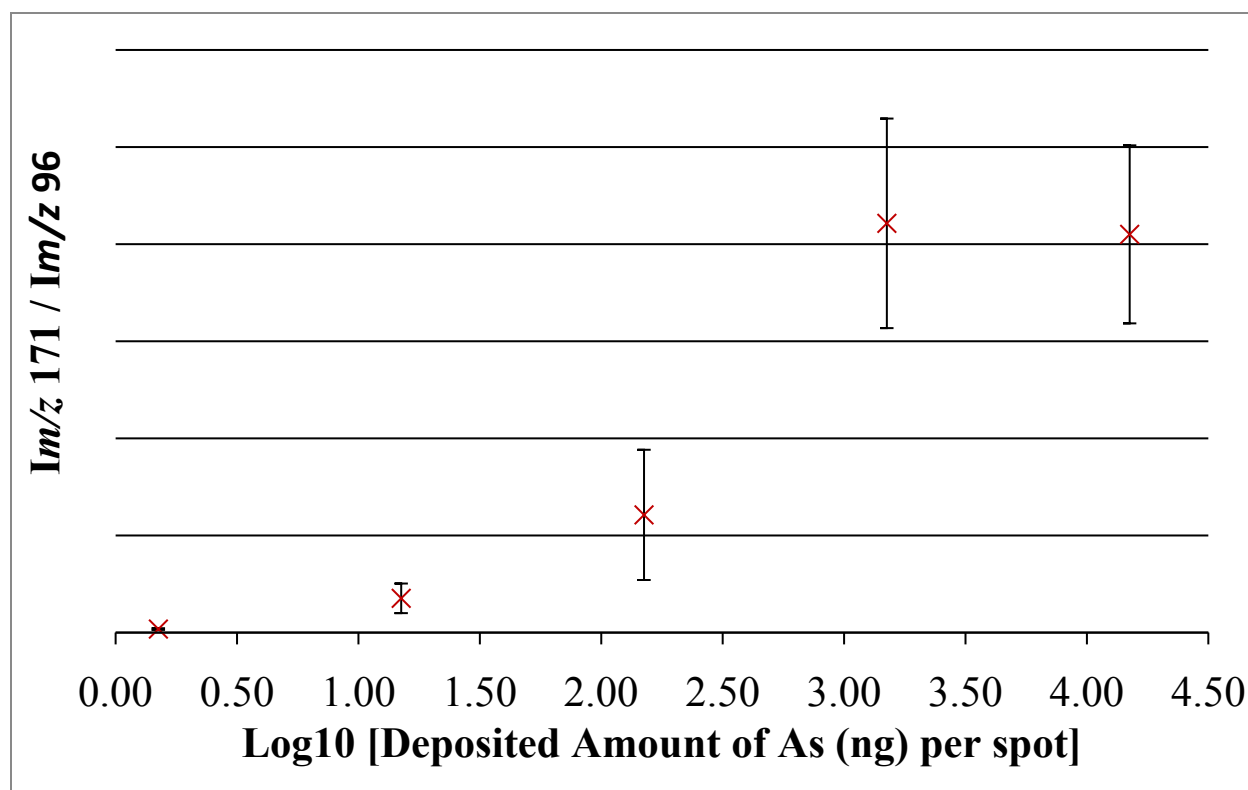

Fig. S5. Intensity ratio of  $m/z$  171 ( $\text{AsS}_3^-$ ) and  $m/z$  96 ( $\text{S}_3^{\bullet-}$ ) peaks versus amount of arsenic (ng) deposited on the sample plate.

Table S1. Correlation between deposited amount of arsenic and  $I_{m/z\ 171} / I_{m/z\ 96}$  peak intensity ratios.

| Sample | Conc. of $\text{NaAsO}_2$ (M) | Volume of $\text{NaAsO}_2$ solution deposited ( $\mu\text{L}$ ) | Amount of As deposited (ng) | Amount of S deposited* ( $\mu\text{g}$ ) | Observed $I_{m/z\ 171} / I_{m/z\ 96}$ peak intensity ratio |
|--------|-------------------------------|-----------------------------------------------------------------|-----------------------------|------------------------------------------|------------------------------------------------------------|
| 1      | $1.00 \times 10^{-5}$         | 2                                                               | 1.5                         | 5.16                                     | 0.04                                                       |
| 2      | $1.00 \times 10^{-4}$         | 2                                                               | 15                          | 5.16                                     | 0.35                                                       |
| 3      | $1.00 \times 10^{-3}$         | 2                                                               | 150                         | 5.16                                     | 1.21                                                       |
| 4      | $1.00 \times 10^{-2}$         | 2                                                               | 1500                        | 5.16                                     | 4.21                                                       |
| 5      | $1.00 \times 10^{-1}$         | 2                                                               | 15000                       | 5.16                                     | 4.10                                                       |

\*The volume of saturated sulfur solution in toluene (1.979 g/ 100 g toluene at 293.15 K; Ren, Y.; Shui, H.; Peng, C.; Liu, H.; Hu, Y., Solubility of elemental sulfur in pure organic solvents and organic solvent–ionic liquid mixtures from 293.15 to 353.15K. *Fluid Phase Equilib.* **2011**, 312, 31-36) added to each spot was 0.3  $\mu\text{L}$

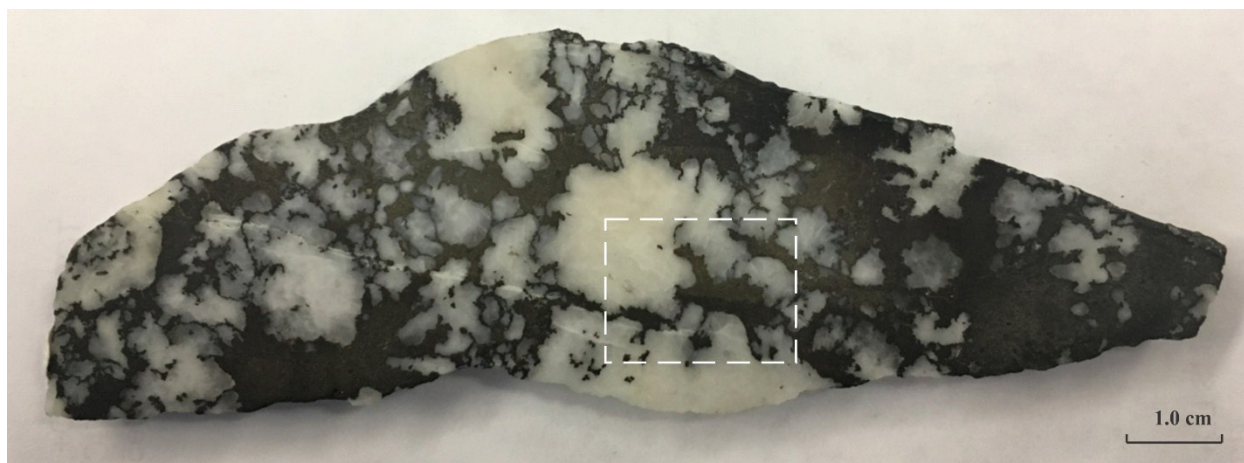

Fig. S6. Photographic image of the domeykite mineral sample (the rectangular area used for imaging is demarcated with white lines).

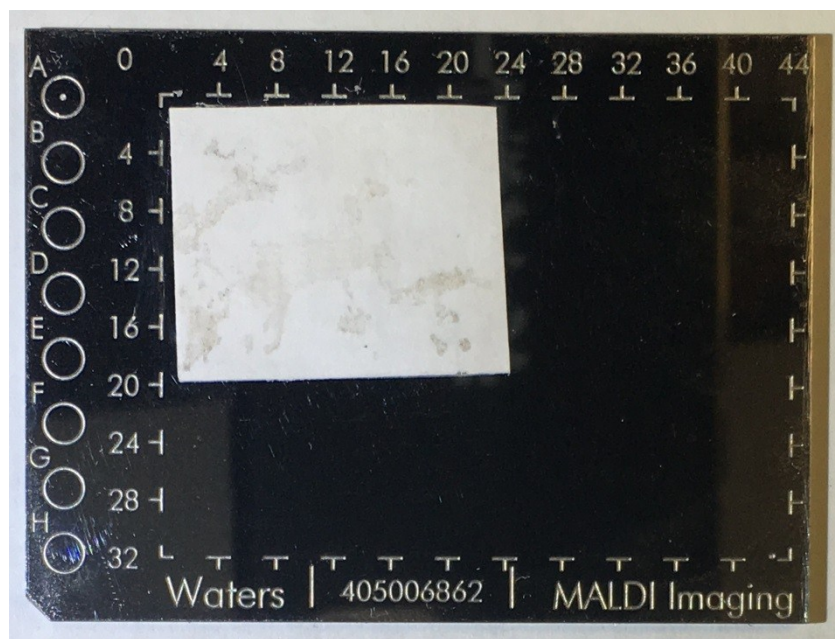

Fig. S7. Photographic image of the latent-print-bearing paper attached to a MALDI plate.
